# Supplementary material
Source: PubMed Central journal article supplement (PMC4641001)
Supplement: NIHMS716548-supplement-01.pdf [file NIHMS716548-supplement-01.pdf]

Material for Online Repository  
 JACI Submission  
 6/2015

**Table 1.** Cases and literature review of HIES patients with endemic fungal infections.

| Case [Reference] | Age*/gender/race | STAT3 mutation (domain) | Endemic mycosis                     | Pulmonary disease          | Extra pulmonary disease                   | Therapy **                                                    | Complications                                             |
|------------------|------------------|-------------------------|-------------------------------------|----------------------------|-------------------------------------------|---------------------------------------------------------------|-----------------------------------------------------------|
| <b>H1</b>        | 10/M/W           | V432M (DNA binding)     | <i>Histoplasma</i>                  | Y                          | Assumed dissemination to liver and spleen | Liposomal amphotericin, itraconazole, posaconazole            | Renal insufficiency from amphotericin                     |
| <b>H2</b>        | 15/F/W           | F621V (SH2)             | <i>Histoplasma</i>                  | N                          | Gastrointestinal                          | Liposomal amphotericin, itraconazole                          | Duodenal stricture, renal insufficiency from amphotericin |
| <b>H3</b>        | 22/F/W           | W479C (DNA binding)     | <i>Histoplasma</i>                  | N                          | Laryngeal                                 | Ketoconazole                                                  | Reconstructive laryngoplasty                              |
| <b>H4[E1]</b>    | 4/F/ND           | ND                      | <i>Histoplasma</i>                  | N                          | Rectal                                    | Unknown                                                       | ND                                                        |
| <b>H5[E2]</b>    | 14/F/ND          | ND                      | <i>Histoplasma</i>                  | N                          | Ileocecal                                 | Itraconazole (12 mo)                                          | ND                                                        |
| <b>H6[E3]</b>    | 27/F/B           | ND                      | <i>Histoplasma</i>                  | N                          | Cecum, colon, bone marrow                 | Amphotericin B (ND), ketoconazole (2 mo)                      | ND                                                        |
| <b>H7 [E4]</b>   | 16/M/ND          | ND                      | <i>Histoplasma</i>                  | N                          | Ileum, cecum, regional lymph nodes        | Ketoconazole (6 mo)                                           | Misdiagnosis as Crohn's disease                           |
| <b>H8[E5]</b>    | 2/M/ND           | K591M (SH2)             | <i>Histoplasma</i>                  | Y                          | Disseminated                              | ND                                                            | Respiratory distress; hypoxia                             |
| <b>H9[E6]</b>    | 33 and 37/M/W    | ND                      | <i>Histoplasma and Cryptococcus</i> | Age 33: <i>Histoplasma</i> | Age 33: Tongue ( <i>Histoplasma</i> )     | Ketoconazole (ND); amphotericin B (ND); <i>Histoplasma</i> ); | Lobectomy for <i>Histoplasma</i> -related                 |

|                  |         |                                 |                                    |                                  |                                                  |                                                                                                     |                                                                             |
|------------------|---------|---------------------------------|------------------------------------|----------------------------------|--------------------------------------------------|-----------------------------------------------------------------------------------------------------|-----------------------------------------------------------------------------|
|                  |         |                                 |                                    |                                  | Age 37:<br>Meningitis<br>( <i>Cryptococcus</i> ) | fluconazole (ND;<br><i>Cryptococcus</i> )                                                           | bronchiectasis                                                              |
| <b>Cr1</b>       | 18/M/A  | R423Q<br>(DNA<br>binding)       | <i>Cryptococcus<br/>gattii</i>     | <i>Cryptococ-<br/>cus gattii</i> | <i>Cryptococcus<br/>gattii</i> meningitis        | Liposomal<br>amphotericin B,<br>flucytosine,<br>voriconazole                                        | Papilledema and<br>increased opening<br>pressures without<br>vision changes |
| <b>Cr2[E7]</b>   | 29/F/B  | ND                              | <i>Cryptococcus<br/>neoformans</i> | N                                | Colon, perirectal<br>abscess                     | Amphotericin B (10<br>wk) and 5-<br>flucytosine (ND)                                                | ND                                                                          |
| <b>Cr3[E8]</b>   | 31/M/W  | ND                              | <i>Cryptococcus<br/>neoformans</i> | N                                | Esophageal                                       | Amphotericin B (6<br>wk) and 5-<br>flucytosine (6 wk)                                               | ND                                                                          |
| <b>Cr4[E9]</b>   | 13/M/ND | ND                              | <i>Cryptococcus<br/>neoformans</i> | N                                | Meningitis                                       | Amphotericin B (10<br>wk), 5-flucytosine (6<br>wk), dexamethasone<br>(12 wk), fluconazole<br>(6 mo) | Myeloperitoneal<br>shunt                                                    |
| <b>Co1</b>       | 4/F/W   | V713M<br>(Trans-<br>activation) | <i>Coccidioides<br/>immitis</i>    | Y                                | Meningitis                                       | Liposomal<br>amphotericin,<br>fluconazole                                                           | Stroke,<br>hydrocephalus,<br>bilateral VP-shunt<br>hypercalcemia            |
| <b>Co2[E10]</b>  | 17/F/ND | T412S<br>(DNA<br>binding)       | <i>Coccidioides<br/>immitis</i>    | Y                                | Meningitis,<br>cerebral abscess                  | Amphotericin B (3<br>wk), fluconazole<br>(lifelong)                                                 | Altered mental<br>status requiring<br>temporary<br>intubation               |
| <b>Co3 [E11]</b> | 4/F/ND  | ND                              | <i>Coccidioides<br/>immitis</i>    | N                                | Meningitis                                       | Amphotericin B<br>(ND), fluconazole<br>(ND)                                                         | Strokes                                                                     |

\* Age is reported in years

\*\* Remains on secondary prophylaxis, unless stated otherwise

A: Asian, B: Black, ND: Not Documented, W: White

[E] references can be found in the Online Repository.

**References of Literature Review Patients**

- E1. Rana C, Krishnani N, Kumari N, Shastri C, Poddar U. Rectal histoplasmosis in Job's syndrome. *Indian J. Gastroenterol. Off. J. Indian Soc. Gastroenterol.* **2013**; 32:64–65.
- E2. Steiner SJ, Kleiman MB, Corkins MR, Christenson JC, Wheat LJ. Ileocecal histoplasmosis simulating Crohn disease in a patient with hyperimmunoglobulin E syndrome. *Pediatr. Infect. Dis. J.* **2009**; 28:744–746.
- E3. Cappell MS, Manzione NC. Recurrent colonic histoplasmosis after standard therapy with amphotericin B in a patient with Job's syndrome. *Am. J. Gastroenterol.* **1991**; 86:119–120.
- E4. Alberti-Flor JJ, Granda A. Ileocecal histoplasmosis mimicking Crohn's disease in a patient with Job's syndrome. *Digestion* **1986**; 33:176–180.
- E5. Robinson WS, Arnold SR, Michael CF, et al. Case report of a young child with disseminated histoplasmosis and review of hyper immunoglobulin e syndrome (HIES). *Clin. Mol. Allergy* **2011**; 9:14.
- E6. Desai K, Huston DP, Harriman GR. Previously undiagnosed hyper-IgE syndrome in an adult with multiple systemic fungal infections. *J. Allergy Clin. Immunol.* **1996**; 98:1123–1124.
- E7. Hutto JO, Bryan CS, Greene FL, White CJ, Gallin JI. Cryptococcosis of the colon resembling Crohn's disease in a patient with the hyperimmunoglobulinemia E-recurrent infection (Job's) syndrome. *Gastroenterology* **1988**; 94:808–812.
- E8. Jacobs DH, Macher AM, Handler R, Bennett JE, Collen MJ, Gallin JI. Esophageal cryptococcosis in a patient with the hyperimmunoglobulin E-recurrent infection (Job's) syndrome. *Gastroenterology* **1984**; 87:201–203.
- E9. Garty BZ, Wolach B, Ashkenazi S, Weismart Y, Rachmel A, Nitzan M. Cryptococcal meningitis in a child with hyperimmunoglobulin E syndrome. *Pediatr Allergy Immunol Off Publ Eur Soc Pediatr Allergy Immunol* **1995**;6:175–7.
- E10. Powers AE, Bender JM, Kumánovics A, et al. *Coccidioides immitis* meningitis in a patient with hyperimmunoglobulin E syndrome due to a novel mutation in signal transducer and activator of transcription. *Pediatr. Infect. Dis. J.* **2009**; 28:664–666.
- E11. Stanga SD, Dajud MV. Visual changes in a 4-year-old. *Clin Pediatr (Phila)* **2008**;47:959–61.
- E12. Vinh DC, Masannat F, Dzioba RB, Galgiani JN, Holland SM. Refractory disseminated coccidioidomycosis and mycobacteriosis in interferon-gamma receptor 1 deficiency. *Clin. Infect. Dis. Off. Publ. Infect. Dis. Soc. Am.* **2009**; 49:e62–65.
- E13. Vinh DC, Schwartz B, Hsu AP, et al. Interleukin-12 receptor  $\beta$ 1 deficiency predisposing to disseminated Coccidioidomycosis. *Clin. Infect. Dis. Off. Publ. Infect. Dis. Soc. Am.* **2011**; 52:e99–e102.
- E14. Sampaio EP, Hsu AP, Pechacek J, et al. Signal transducer and activator of transcription 1 (STAT1) gain-of-function mutations and disseminated coccidioidomycosis and histoplasmosis. *J. Allergy Clin. Immunol.* **2013**; 131:1624–1634.
